# Supplementary material for: Overexpression of MAX dimerization protein 3 (MXD3) predicts poor prognosis in clear cell renal cell carcinoma
Source: PubMed Central journal article supplement — Transl Androl Urol. 2021 Feb;10(2):785–96. doi: 10.21037/tau-20-1187 (PMC7947448; doi:10.21037/tau-20-1187), 2021-02
Supplement: tau-10-02-785-dss.pdf [file tau-10-02-785-dss.pdf]

## Data Sharing Statement

|                     |                                                                                                                                                     |                                                                                                                                                                                                                 |
|---------------------|-----------------------------------------------------------------------------------------------------------------------------------------------------|-----------------------------------------------------------------------------------------------------------------------------------------------------------------------------------------------------------------|
| <b>Article Info</b> | http://dx.doi.org/10.21037/tau-20-1187.                                                                                                             |                                                                                                                                                                                                                 |
| <b>Item</b>         | <b>Question</b>                                                                                                                                     | <b>Authors' Response<br/>(place "-" if not applicable)</b>                                                                                                                                                      |
| 1                   | Would you like to share data collected for your study to others?                                                                                    | Yes                                                                                                                                                                                                             |
| 2                   | If not, would you like to share the reason for your decision?                                                                                       | -                                                                                                                                                                                                               |
| 3                   | What data in particular will be shared?                                                                                                             | The gene expression profile and clinical information we used in the paper can be shared.                                                                                                                        |
| 4                   | Any other documents will be shared? Such as study protocol, statistical analysis plan, informed consent form, clinical study report, analytic code. | Statistical analysis plan.                                                                                                                                                                                      |
| 5                   | When will data availability begin?                                                                                                                  | From the publication date.                                                                                                                                                                                      |
| 6                   | When will data availability end?                                                                                                                    | Two years within the publication date, since the technique or survival date may be updated over time.                                                                                                           |
| 7                   | To whom will you share the data?                                                                                                                    | Medical oncologist and urologist who are interested in this study.                                                                                                                                              |
| 8                   | For what type of analysis or purpose?                                                                                                               | For analysis to polish the research in the field of renal cell carcinoma.                                                                                                                                       |
| 9                   | How or where can the data/documents be obtained?                                                                                                    | Emails could be sent to the address below to obtain the shared data: <a href="mailto:dongwei63@yeah.net">dongwei63@yeah.net</a> or <a href="mailto:zfy18@mails.tsinghua.edu.cn">zfy18@mails.tsinghua.edu.cn</a> |
| 10                  | Any other restrictions?                                                                                                                             | We may balance the potential benefits and risks for each request and then provide the data that could be shared.                                                                                                |
